# Supplementary material
Source: MDPI journal article supplement (https://www.mdpi.com/2079-9292/8/3/343)
Supplement: s1 [file s1]

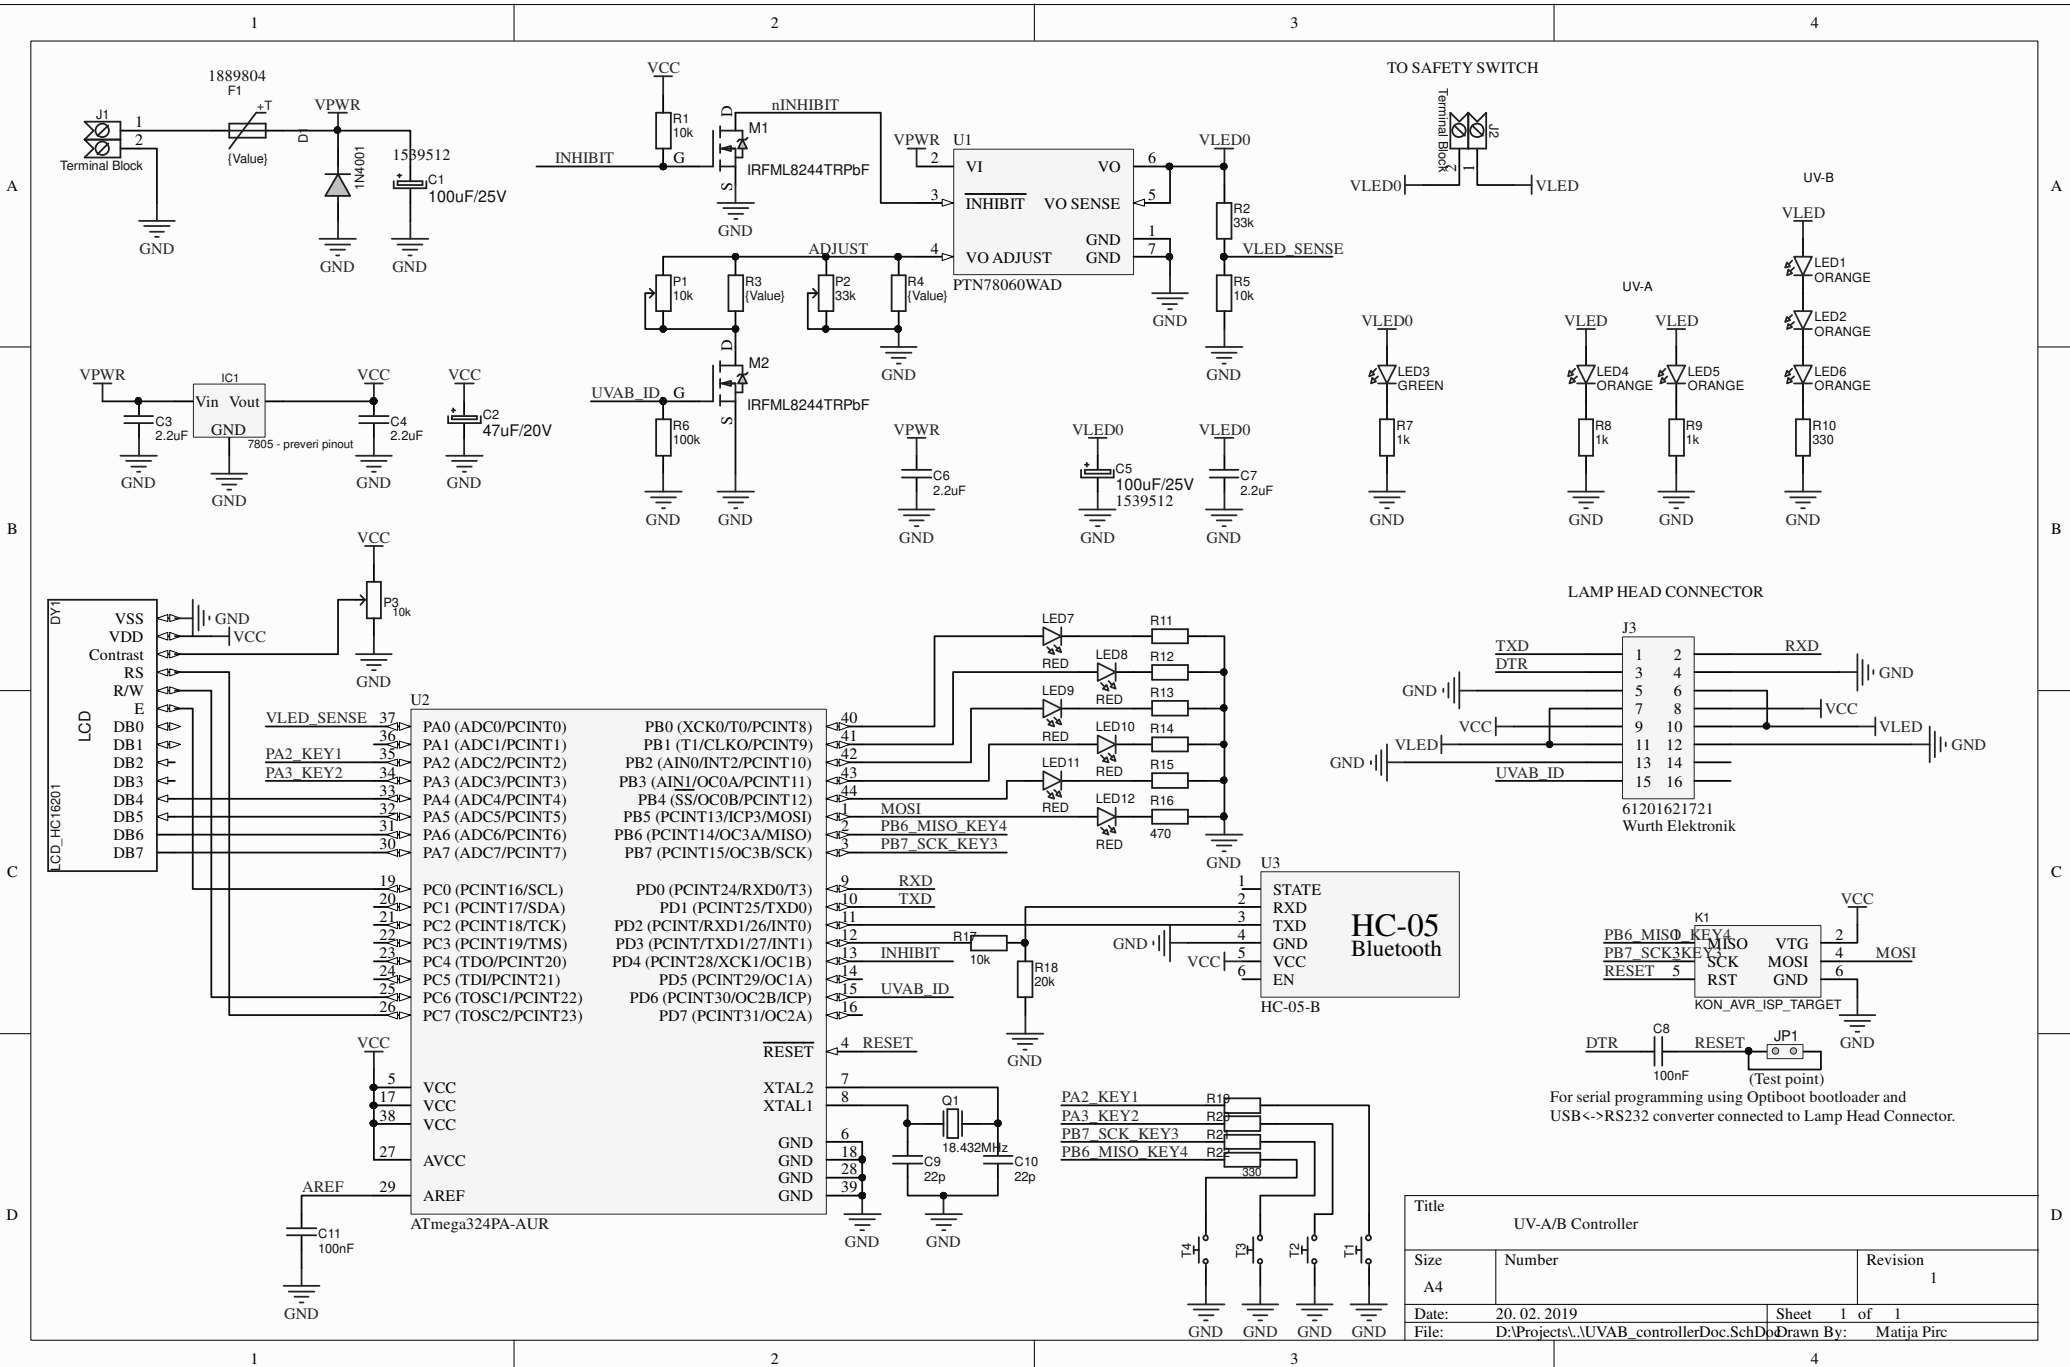

| Title             |                                                 |              |
|-------------------|-------------------------------------------------|--------------|
| UV-A/B Controller |                                                 |              |
| Size              | Number                                          | Revision     |
| A4                |                                                 | 1            |
| Date:             | 20.02.2019                                      | Sheet 1 of 1 |
| File:             | D:\Projects\UVAB_controllerDoc\SchDoc\Drawn By: | Matija Pirc  |
